# Supplementary material for: The Escherichia coli Amino Acid Uptake Protein CycA: Regulation of Its Synthesis and Practical Application in l-Isoleucine Production
Source: MDPI journal article supplement (doi:10.3390/microorganisms10030647), 2022-03-17
Supplement: s1 [file s1]

## S1. Construction of strains

### S1.1. Construction of *E. coli* Strain MG1655 *cat-P<sub>L</sub>-cycA*

To construct *E. coli* strain MG1655 *cat-P<sub>L</sub>-cycA*, the native regulatory region of the *cycA* gene was replaced with the phage lambda P<sub>L</sub> promoter via  $\lambda$ Red-mediated integration. For that purpose, we amplified the *cat-P<sub>L</sub>* fragment using the oligonucleotide P1 and P2 with 36 nt homology to the region upstream of the *cycA* gene. The chromosomal DNA of strain BW25113 *cat-P<sub>L</sub>-yddG* was used as a template for PCR. The method for obtaining BW25113 *cat-P<sub>L</sub>-yddG* has been previously described in detail [39].

### S1.2. Construction of *E. coli* Strain MG1655 *cat-P<sub>cycA</sub>-lacZ*

To construct the *cat-P<sub>cycA</sub>-lacZ* expression unit, the *cat* gene was first introduced upstream of the *cycA* gene on the chromosome of *E. coli* strain MG1655 using  $\lambda$ Red-mediated integration. A DNA fragment bearing the  $\lambda$ attL-*cat*- $\lambda$ attR cassette was amplified by PCR using the oligonucleotide primers P3 and P4, and the plasmid pMW118- $\lambda$ attL-*cat*- $\lambda$ attR [44] was used as the template. Secondly, the fragment *cat-P<sub>cycA</sub>* including  $\lambda$ attL-*cat*- $\lambda$ attR and the P<sub>cycA</sub> regulatory region containing the first 33 nt of the coding sequence (–223; +117 relative to the transcription start site, TSS) was PCR-amplified using the oligonucleotide primers P5 and P6 with 36 nt homology to the region upstream of the *lacZ* gene, and DNA of the *E. coli* MG1655 *cat-cycA* strain was used as a template. The obtained PCR fragment was inserted into the *E. coli* MG1655/pKD46 genome in a region upstream of the *lacZ* gene via  $\lambda$ Red-mediated integration. As a result, the strain *E. coli* MG1655 *cat-P<sub>cycA</sub>-lacZ* was obtained.

### S1.3. Construction of *E. coli* K12 $2\Delta$ P<sub>L</sub>-*ilvBN*<sup>tr</sup> *cat-P<sub>cycA</sub>-lacZ*

The strain MG1655 *cat-P<sub>cycA</sub>-lacZ* was used as a donor for the transfer of the cassette *cat-P<sub>cycA</sub>-lacZ* into the Val-resistant strain K12  $2\Delta$  P<sub>L</sub>-*ilvBN*<sup>tr</sup> (kindly provided by Dr. Sycheva, [40]) using the P1 transduction method [46].

### S1.4. Construction of the Set of *E. coli* Strains with Deleted Transcription Factor Genes and Possessing *cat-P<sub>cycA</sub>-lacZ* Cassette

The strain MG1655 *cat-P<sub>cycA</sub>-lacZ* was used as a donor for the transfer of the cassette *cat-P<sub>cycA</sub>-lacZ* into the strains K12 BW25113 from the KEIO collection with different individual knockouts of genes encoding transcription factors (*gcvB*, *hns*, *ihfA*, *crp*, *farR*, *rpoS*, and *lrp*) [45] using the P1 transduction method [46].

### S1.5. Construction of *E. coli* Strain MG1655 *cat-P<sub>cycA</sub>-5'-UTR<sub>lacZ</sub>-lacZ* and Its $\Delta$ *crp* Derivative

The strain MG1655 *cat-P<sub>cycA</sub>-5'-UTR<sub>lacZ</sub>-lacZ* was constructed as described for MG1655 *cat-P<sub>cycA</sub>-lacZ* above, except for the position of the P<sub>cycA</sub> regulatory region (–223; –1 relative to TSS). The strain BW25113  $\Delta$ *crp* from the KEIO collection [45] was used as a donor for the transfer of the chromosome knockout into the MG1655 *cat-P<sub>cycA</sub>-5'-UTR<sub>lacZ</sub>-lacZ* strain by means of the P1 transduction method [46].

### S1.6. Construction of *E. coli* Strain 44-3-15 Scr *kan*-P<sub>L</sub>-*cycA*

To obtain the Ile-producing strain with overexpressed *cycA* gene, in the strain 44-3-15 Scr (B7 *ilvG\*ilvA\** mini-Mu-P<sub>R</sub>-*ilvG\*MEDA\*YC* mini-Mu-P<sub>R</sub>-*thrA\*BC-cat Scr*, [42]), the native regulatory region of the *cycA* gene was replaced with the “strong” promoter P<sub>L</sub>. In this case, we used kanamycin resistance (*kan*) as a marker since the strain 44-3-15 Scr already had chloramphenicol resistance. The construct *kan*-P<sub>L</sub>-*cycA* was obtained using the method of  $\lambda$ -Red integration in the chromosome of the MG1655 strain (as described for *cat*-P<sub>L</sub>-*cycA* above, but the source of the marker gene was pMW118- $\lambda$ attL-*kan*- $\lambda$ attR). The strain MG1655 *kan*-P<sub>L</sub>-*cycA* was used as a donor for the transfer of the cassette *kan*-P<sub>L</sub>-*cycA* into the Ile-producing strain 44-3-15 Scr via the P1 transduction method [46].

**Table S1.** Sequences of the PCR primers used in this study.

| No. | Sequence 5'–3'                                                                | Description                                                                                                                                           |
|-----|-------------------------------------------------------------------------------|-------------------------------------------------------------------------------------------------------------------------------------------------------|
| P1  | CCCGTAAGCGTGTATTTTTGTGAGCTGTTTCGCGTTCGCTC<br>AAGTTAGTATAAAAAAGCTGAAC          | Replacement of the native regulatory region of the <i>cycA</i> gene with phage lambda P <sub>L</sub> promoter                                         |
| P2  | GATCATCGGCAACGACTTTTACCTGATCTACCATGTTTAG<br>TTCTCCTTCCGGCCAATGCTTCGTT         | Replacement of the native regulatory region of the <i>cycA</i> gene with phage lambda P <sub>L</sub> promoter                                         |
| P3  | TGTTCTCAATCATAGCCTATGAATAAGCTAACGCTTGA<br>AGCCTGCTTTTTTATACTAAGTTGG           | Integration of the <i>cat</i> gene upstream of the <i>cycA</i> gene                                                                                   |
| P4  | GTAATGAACACGAACGCGGTTCGGTACGTGCCGGAATCG<br>CTCAAGTTAGTATAAAAAAGCTGAAC         | Integration of the <i>cat</i> gene upstream of the <i>cycA</i> gene                                                                                   |
| P5  | GTTTTCCAGTCACGACGTTGTAAAACGACGGCCAGATC<br>ATCGGCAACGACTTTTACC                 | Integration of the <i>cat</i> -P <sub>cycA</sub> expression unit upstream of the <i>lacZ</i>                                                          |
| P6  | GCACGACAGGTTTCCCGACTGGAAAGCGGGCAGTGATG<br>AAGCCTGCTTTTTTATACTAAGTTGG          | Integration of the <i>cat</i> -P <sub>cycA</sub> or <i>cat</i> -P <sub>cycA</sub> -5'-UTR <sub>lacZ</sub> expression unit upstream of the <i>lacZ</i> |
| P7  | CTGTTTCCTGTGTGAAATTGTTATCCGCTCACAATTCATC<br>GATATTAGGTAACAATACGCGGG<br>TAMRA- | Integration of the <i>cat</i> -P <sub>cycA</sub> -5'-UTR <sub>lacZ</sub> -expression unit upstream of the <i>lacZ</i>                                 |
| P8  | CCAGGCGGTGAAGGGCAATCAGCTGTTGCCCCGTCTCACT<br>GGTGAAAAG                         | Amplification of the fragment of the <i>lacZ</i> gene promoter region (–238; –20 relative to the TSS)                                                 |
| P9  | TAMRA-AAGCATAAAGTGTAAGC                                                       | Amplification of the fragment of the <i>lacZ</i> gene promoter region (–238; –20 relative to the TSS)                                                 |
| P10 | TAMRA-CGTTACGACACCCTGGTGTTT                                                   | Amplification of the fragments of the <i>cycA</i> gene promoter region #1 (–261; –63 relative to the TSS) and #3 (–261; –123 relative to the TSS)     |
| P11 | TAMRA-TGTTTAAAGTGAGTGCATATCACGGTGA                                            | Amplification of the fragment of the <i>cycA</i> gene promoter region #1 (–261; –63 relative to the TSS) and #2 (–136; –63 relative to the TSS)       |
| P12 | CAAAGACCCCGTAAGCGTGTATTTTTGTGAGCTGTTTCGC<br>GTTATCACCGTGATATGACACTCACTTTAAACA | Amplification of the fragment of the <i>cycA</i> gene promoter region #2 (–136; –63 relative to the TSS)                                              |
| P13 | TACGGGGTCTTTGCAACACA                                                          | Amplification of the fragment of the <i>cycA</i> gene promoter region #3 (–261; –123 relative to the TSS)                                             |
